# Supplementary figures and images for: Fundamental Role of Pentose Phosphate Pathway within the Endoplasmic Reticulum in Glutamine Addiction of Triple-Negative Breast Cancer Cells
Source: MDPI journal article supplement (doi:10.3390/antiox12010043), 2022-12-26

# Ligand-Tracer calibration

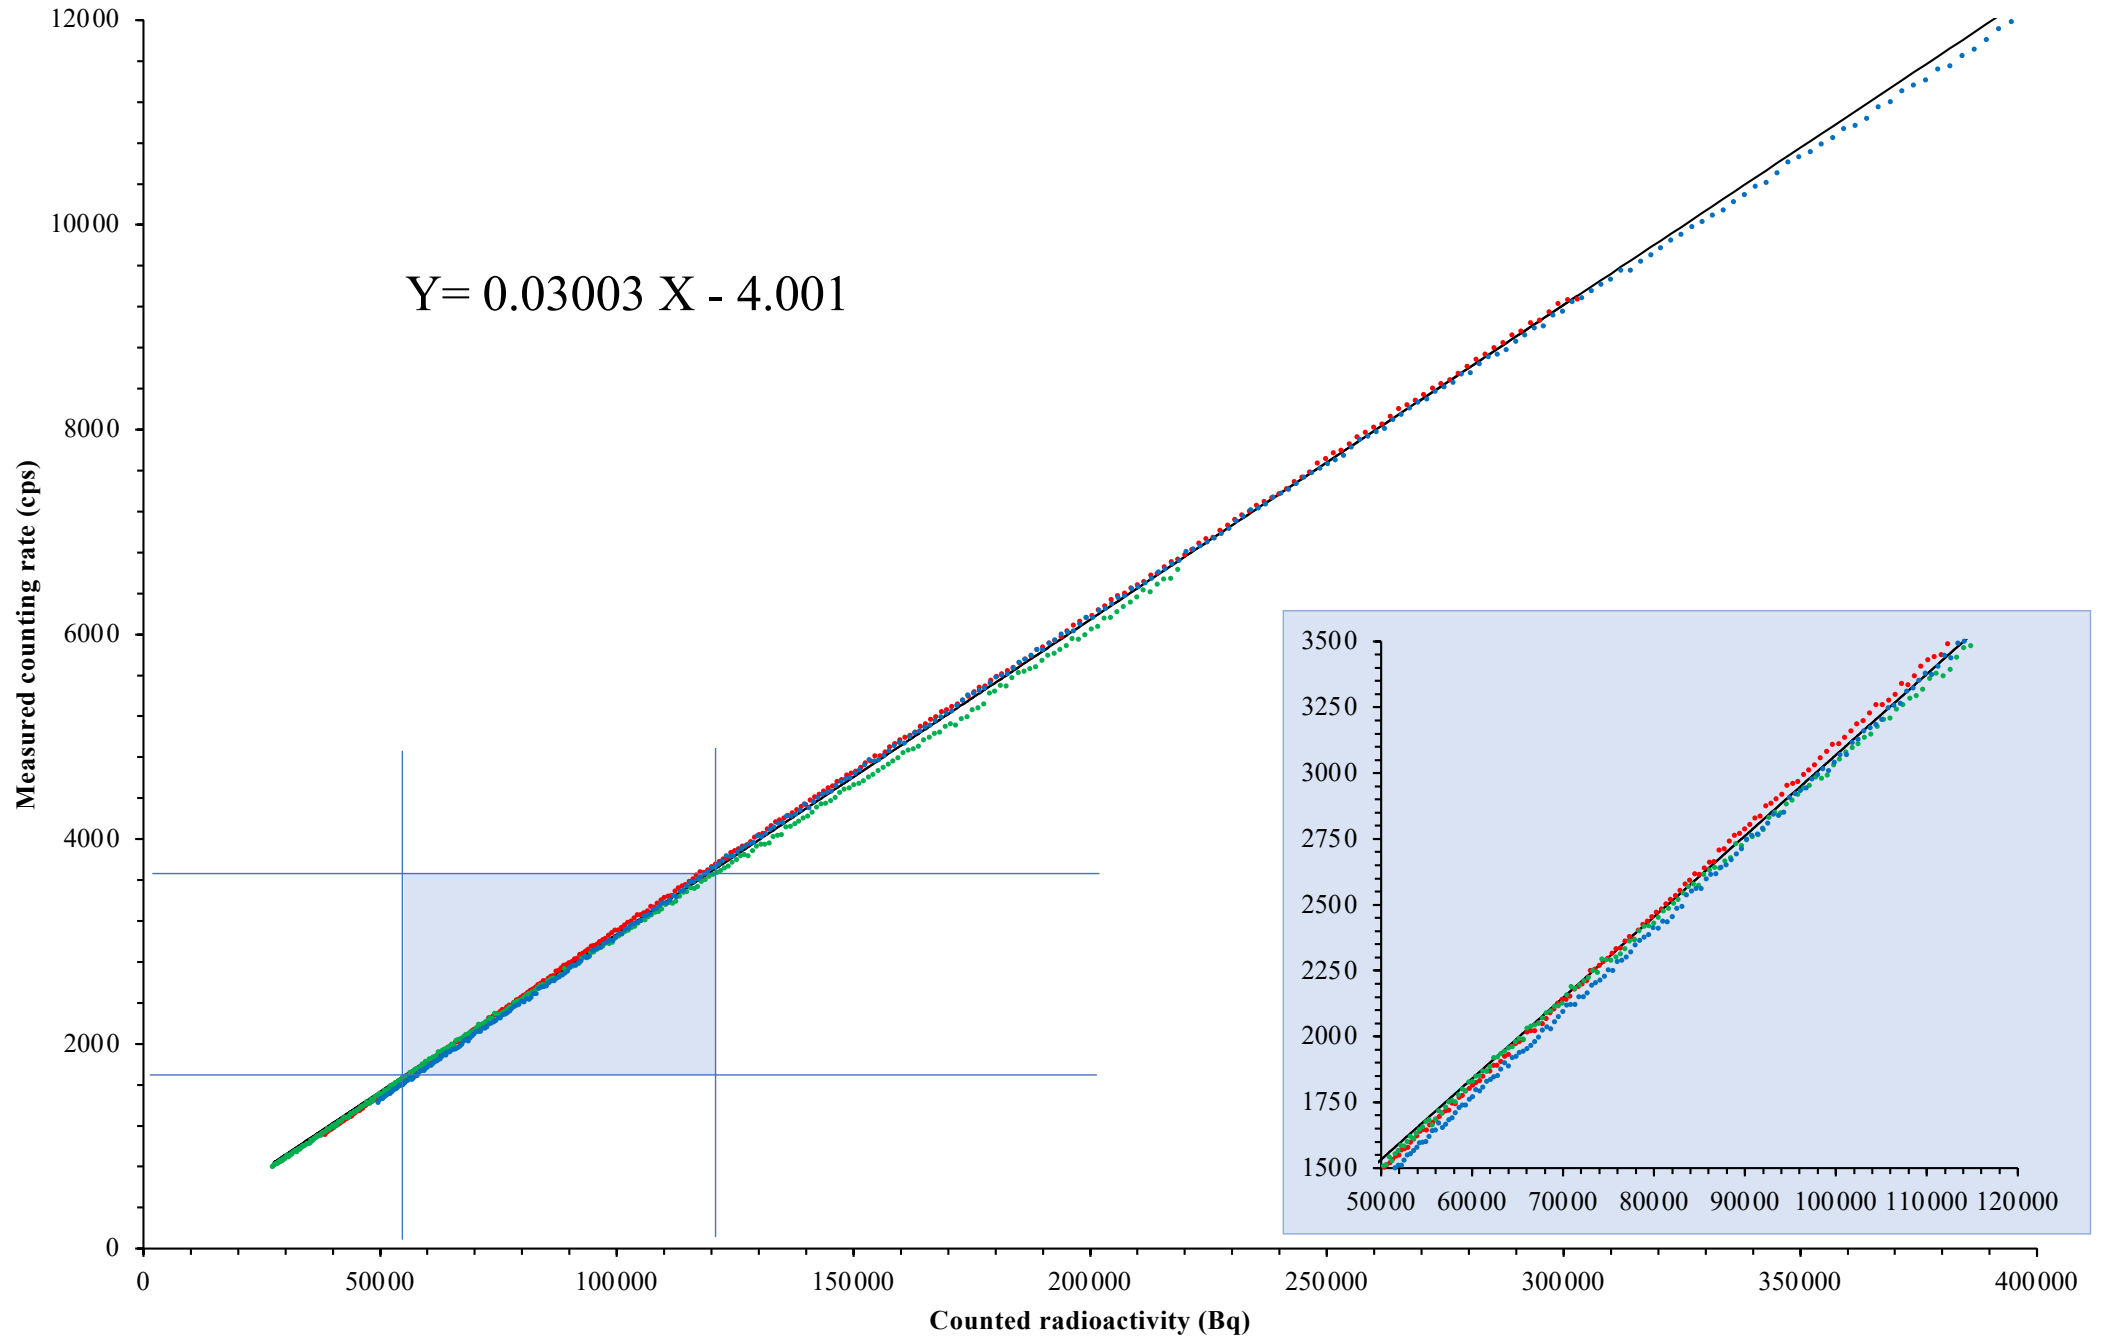

Supplement: s1 [file s1]
